# Supplementary material
Source: PubMed Central journal article supplement (PMC212789)
Supplement: jamia_M1062_2.pdf [file jamia_M1062_2.pdf]

## JAMIA M1062 ONLINE DATA SUPPLEMENT Table 1:

Structure and size of the review criteria of BMJ, JAMIA, CONSORT and of the proposed refined quality criteria.

|                                                 | BMJ                                                                                                                                                        | JAMIA                                                                                                                                                                              | CONSORT                     | Proposed refined quality criteria                                                                                                                                                                           |
|-------------------------------------------------|------------------------------------------------------------------------------------------------------------------------------------------------------------|------------------------------------------------------------------------------------------------------------------------------------------------------------------------------------|-----------------------------|-------------------------------------------------------------------------------------------------------------------------------------------------------------------------------------------------------------|
| Significance, scientific impact                 | 16 criteria (as part of rejection checklist)                                                                                                               | (part of criteria for specific types of papers)                                                                                                                                    |                             | 5 criteria                                                                                                                                                                                                  |
| General quality of content                      | 12 criteria (as part of rejection checklist)<br>6 criteria (as part of scientific reliability)                                                             | (part of criteria for specific types of papers)                                                                                                                                    |                             | 25 criteria                                                                                                                                                                                                 |
| Additional criteria for certain types of papers | 12 criteria for qualitative research<br>11 for general statistics<br>26 for RCT<br>35 for health economics papers<br>23 for clinical management guidelines | 5 criteria for review papers<br>3 criteria for viewpoint papers<br>4 criteria for application reports<br>6 criteria for model formulation papers<br>6 criteria for research papers | 21 criteria for RCT reports | 10 criteria for empirical investigations (incl. RCT)<br>7 for qualitative research papers<br>5 for methodological papers<br>7 for application reports<br>7 for systematic reviews<br>6 for viewpoint papers |
| Originality                                     | 1 criteria                                                                                                                                                 | (part of criteria for specific types of papers)                                                                                                                                    |                             | 3 criteria                                                                                                                                                                                                  |
| Coverage of literature                          | 1 criteria (as part of scientific reliability)                                                                                                             | (part of criteria for specific types of papers)                                                                                                                                    |                             | 4 criteria                                                                                                                                                                                                  |
| Organization of paper                           |                                                                                                                                                            | (part of criteria for specific types of papers)                                                                                                                                    |                             | 14 criteria                                                                                                                                                                                                 |
